# Supplementary material
Source: PubMed Central journal article supplement (PMC4169989)

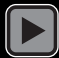

Supplement: NIHMS294926-supplement-Suppl_Figure_3.pdf [file NIHMS294926-supplement-Suppl_Figure_3.pdf]

Iba1 Intensity/Cell & Sample

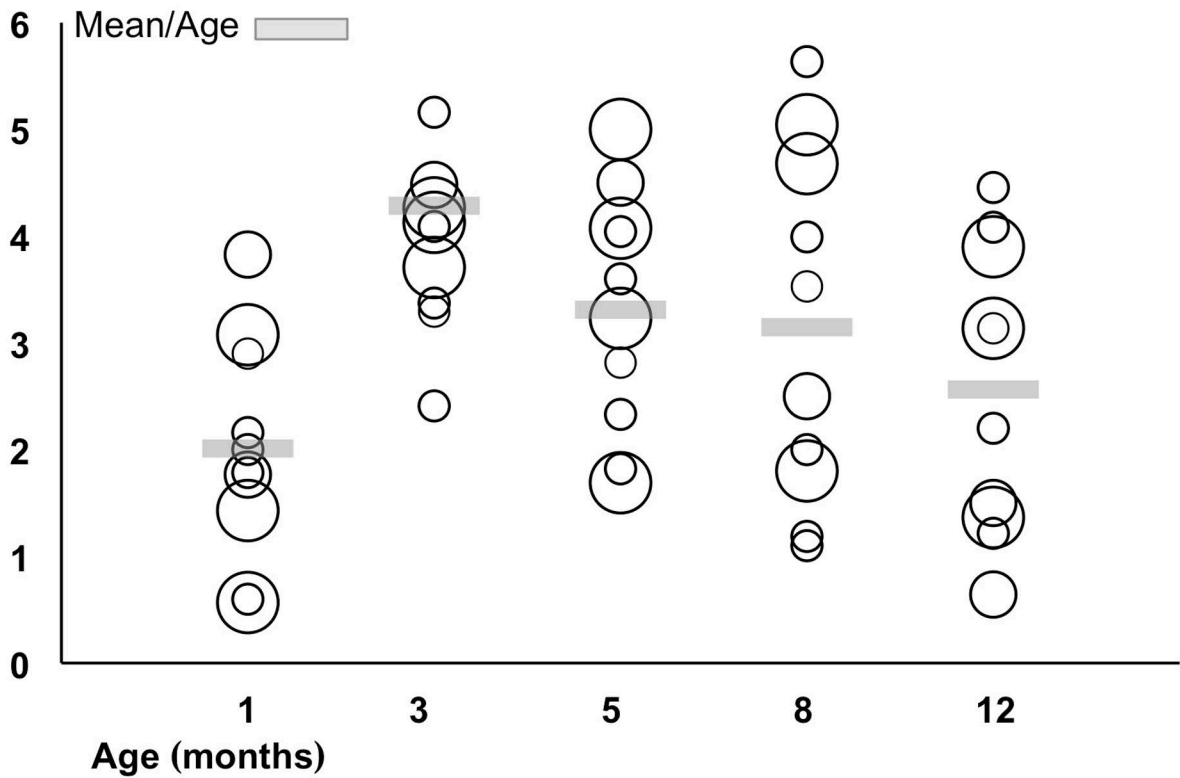

Supplement: NIHMS294926-supplement-Suppl_Figure_5.pdf [file NIHMS294926-supplement-Suppl_Figure_5.pdf]

**A**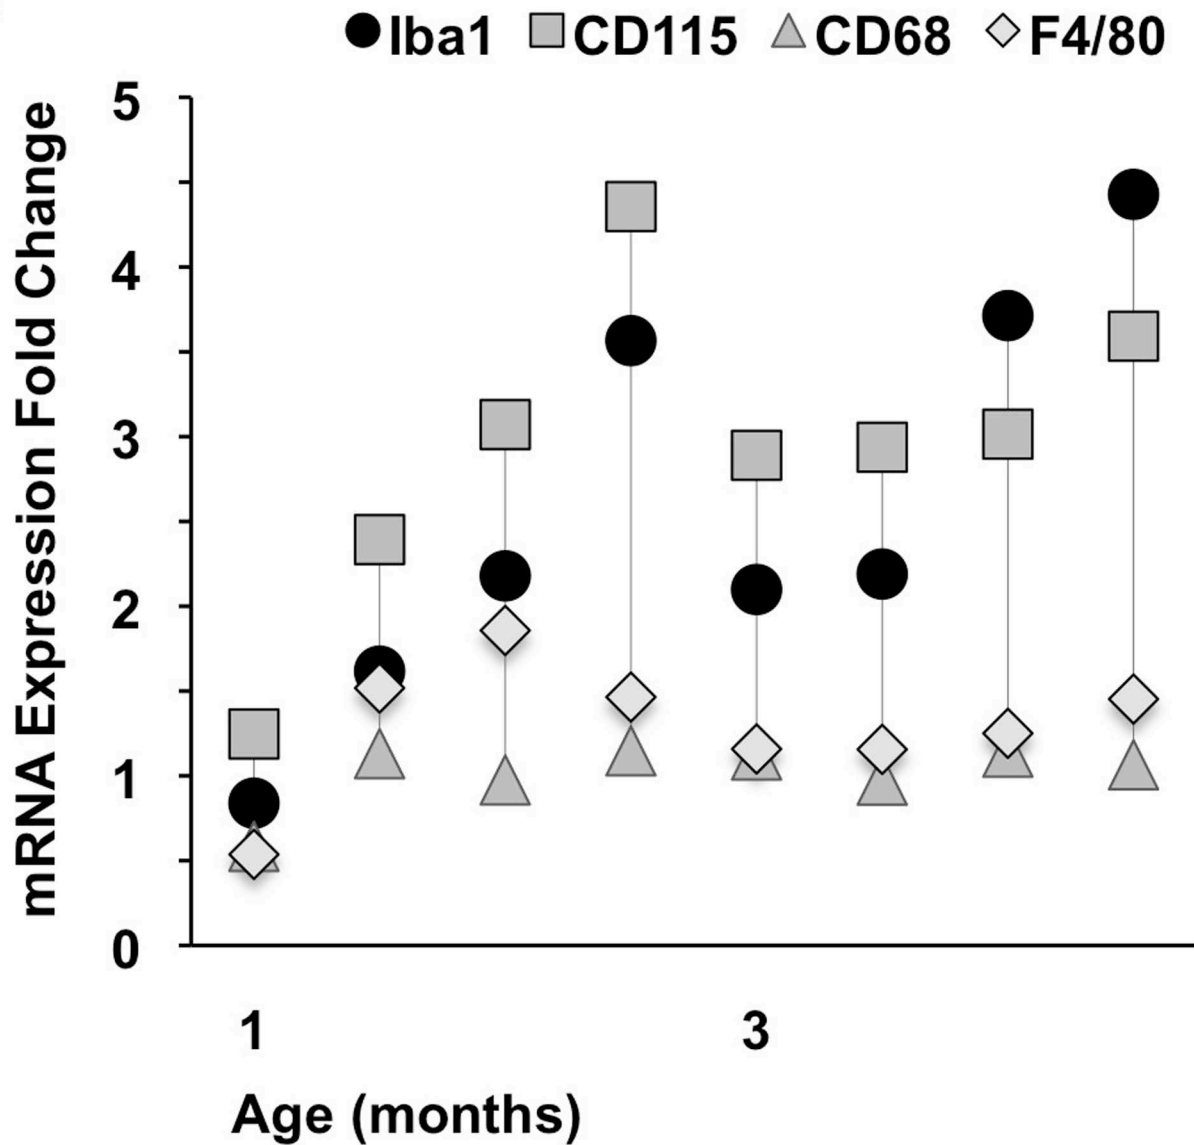

Supplement: NIHMS294926-supplement-Suppl_Figure_6.pdf [file NIHMS294926-supplement-Suppl_Figure_6.pdf]
